# Supplementary material for: The genetic structure of the Belgian population
Source: PubMed Central journal article supplement (PMC5796395; doi:10.1186/s40246-018-0136-8), 2018-02-02

**A**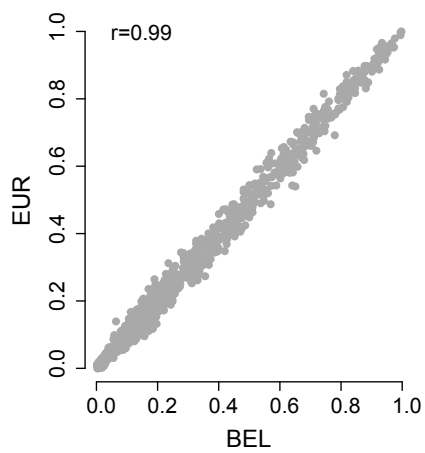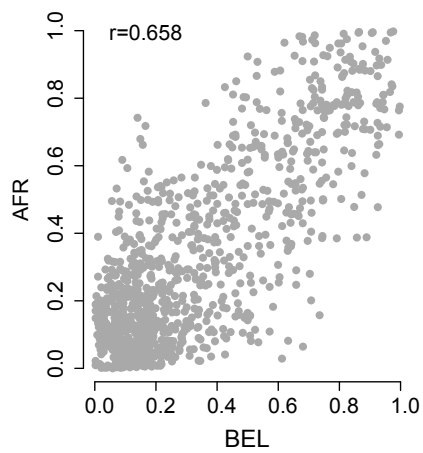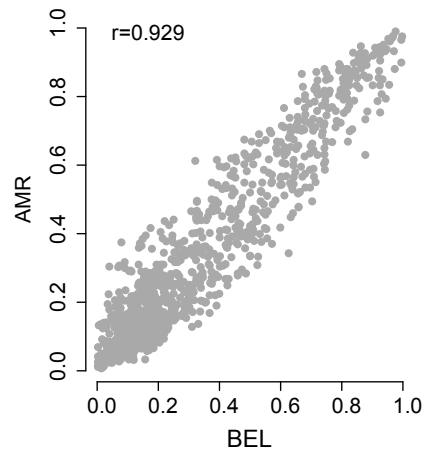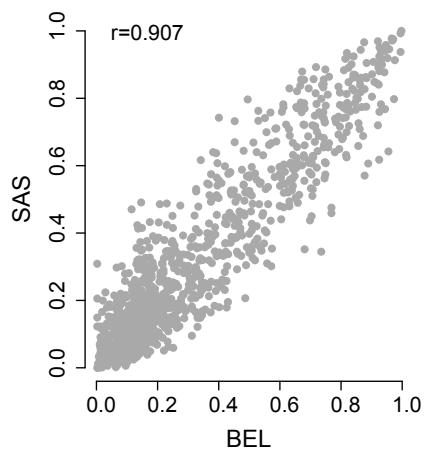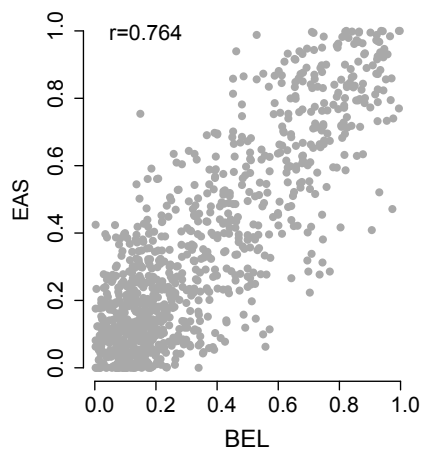**B**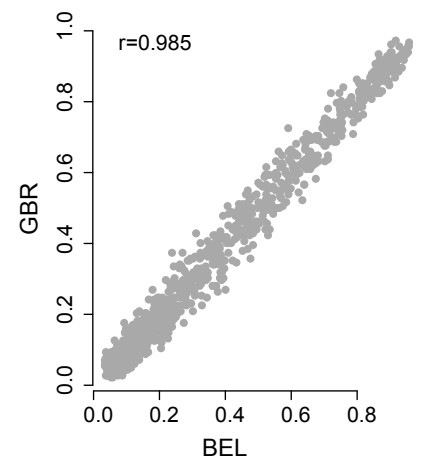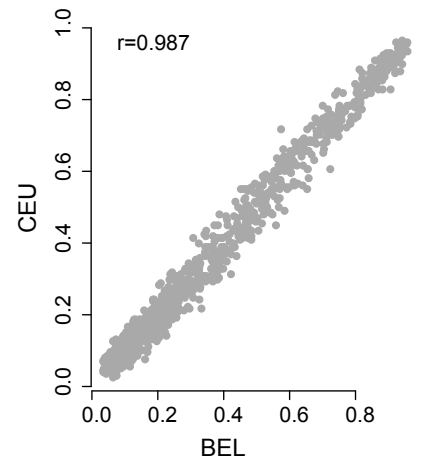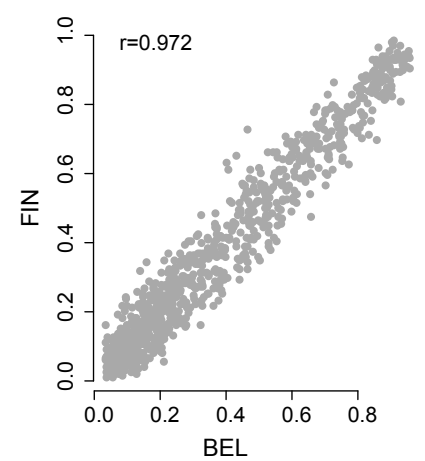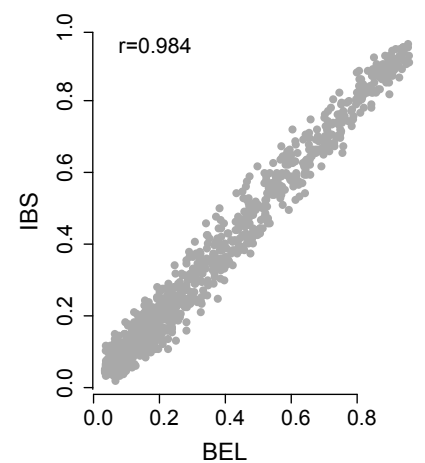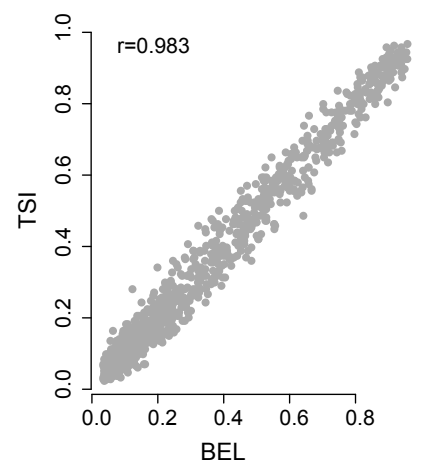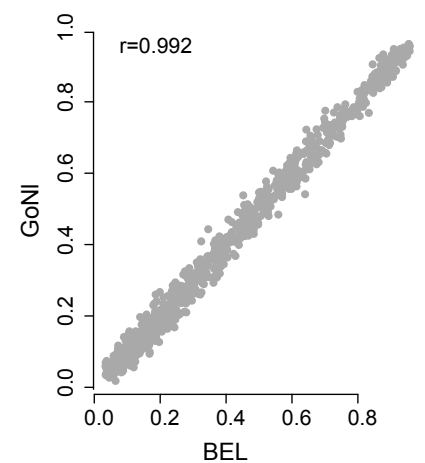

Supplement: 40246_2018_136_MOESM6_ESM.pdf [file 40246_2018_136_MOESM6_ESM.pdf]
